# Supplementary material for: Contribution to Characterizing the Meat Quality of Protected Designation of Origin Serrana and Preta de Montesinho Kids Using the Near-Infrared Reflectance Methodology
Source: MDPI journal article supplement (doi:10.3390/foods13101581), 2024-05-19
Supplement: s1 [file s1]

## Supplementary Material

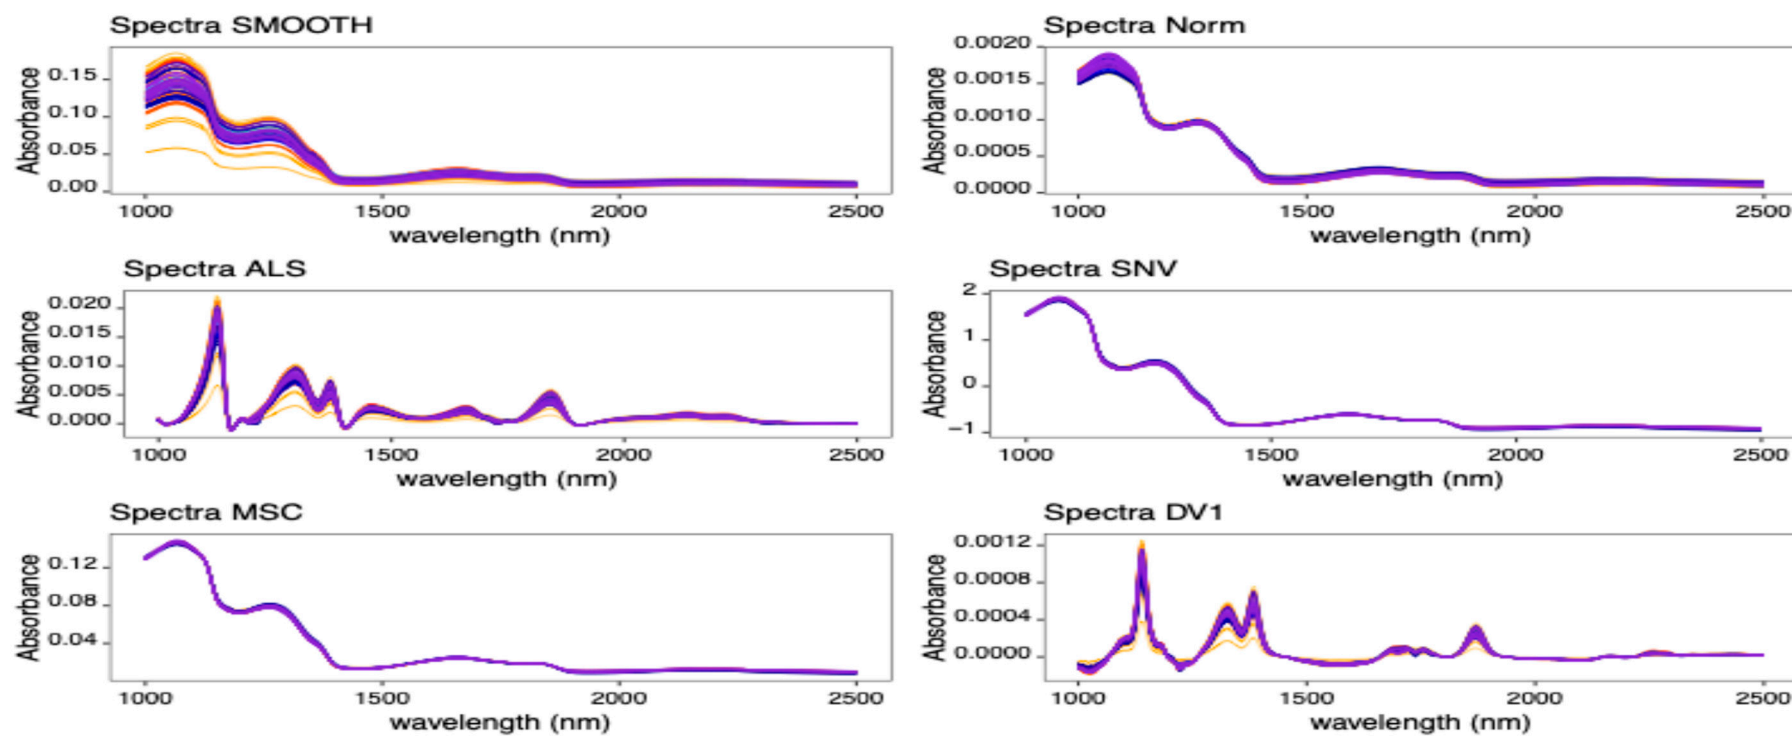

**Figure S1.** Representation of SMOOTH, Norm, ALS, SNV, MSC, DV1, DV2, Norm+DV1, ALS+DV1, SNV+DV1, MSC+DV1 spectra obtained from the muscle samples.

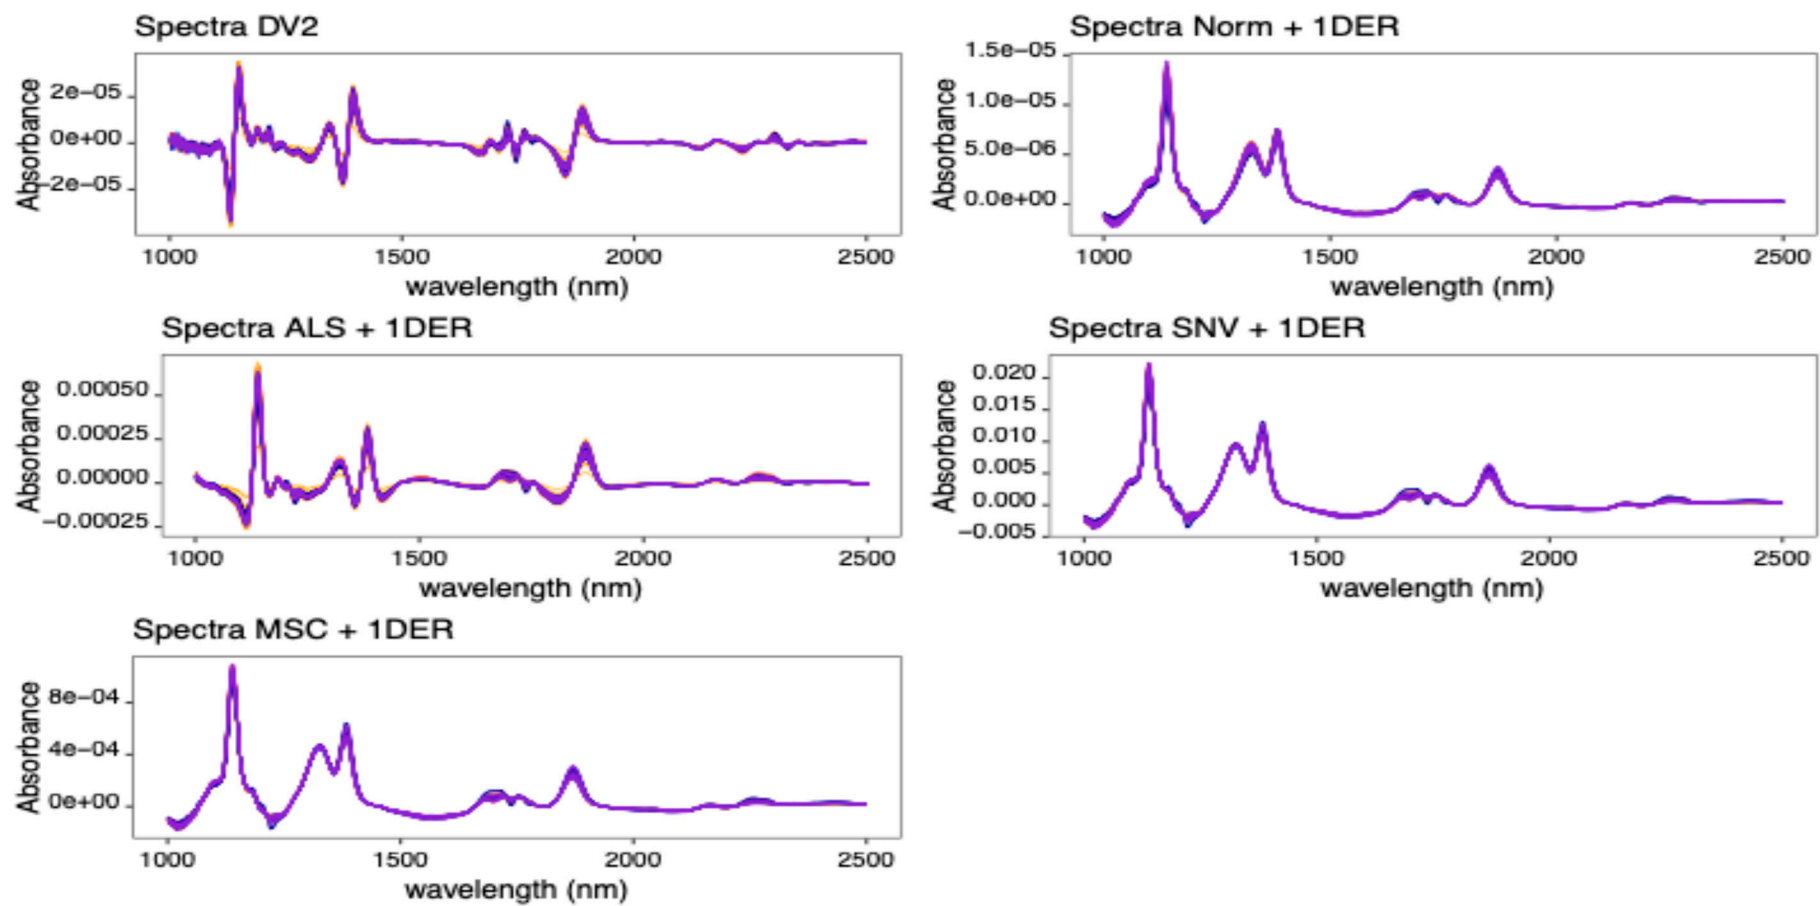

**Figure S1.** (continuation). Representation of all smoothed, NORM-SMT, ALS-SMT, SNV-SMT, MSC-SMT, DV1 and DV2 spectra obtained from the muscle samples.
